# Supplementary material
Source: PubMed Central journal article supplement (PMC3779112)
Supplement: tjp0591-4207-SD4.pdf [file tjp0591-4207-SD4.pdf]

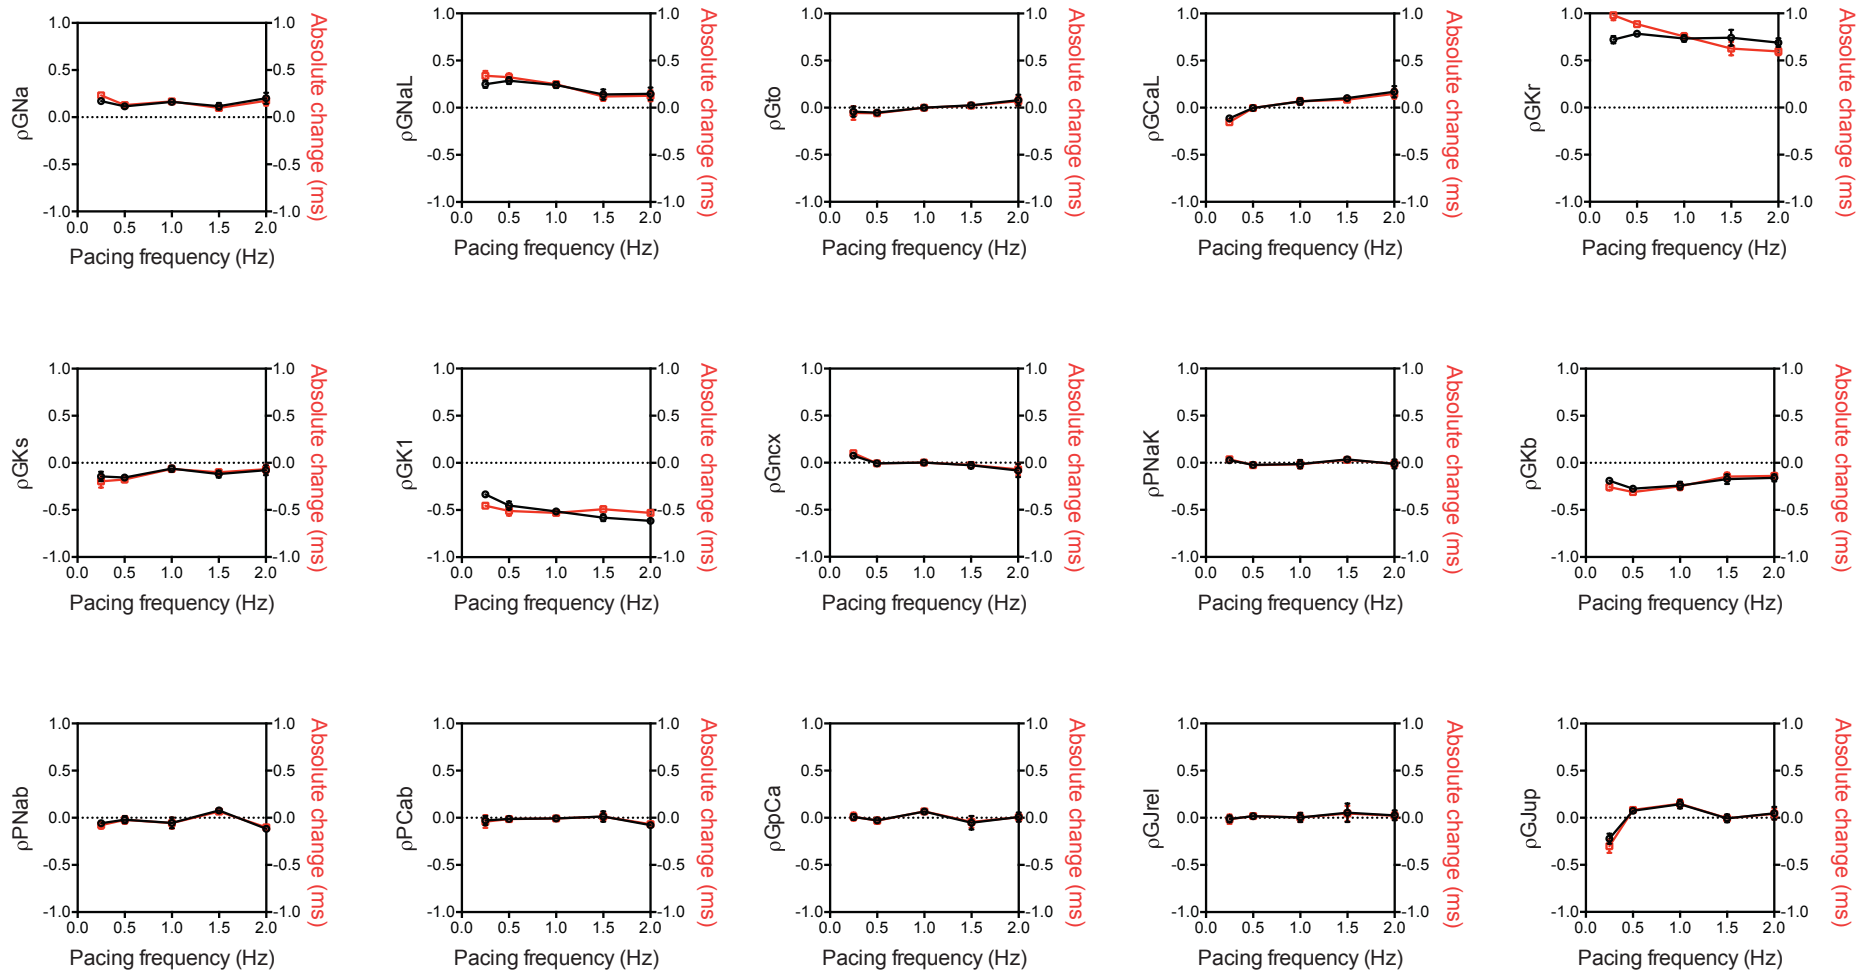

**Supplementary Figure 4:** Rate dependence of PLS regression coefficients ( $\rho$ , black line) and absolute changes (red line) in  $T_{peak} - T_{end}$  for all ionic conductances in the ventricular cell model.
