# Supplementary material
Source: PubMed Central journal article supplement (PMC3779112)
Supplement: tjp0591-4207-SD5.pdf [file tjp0591-4207-SD5.pdf]

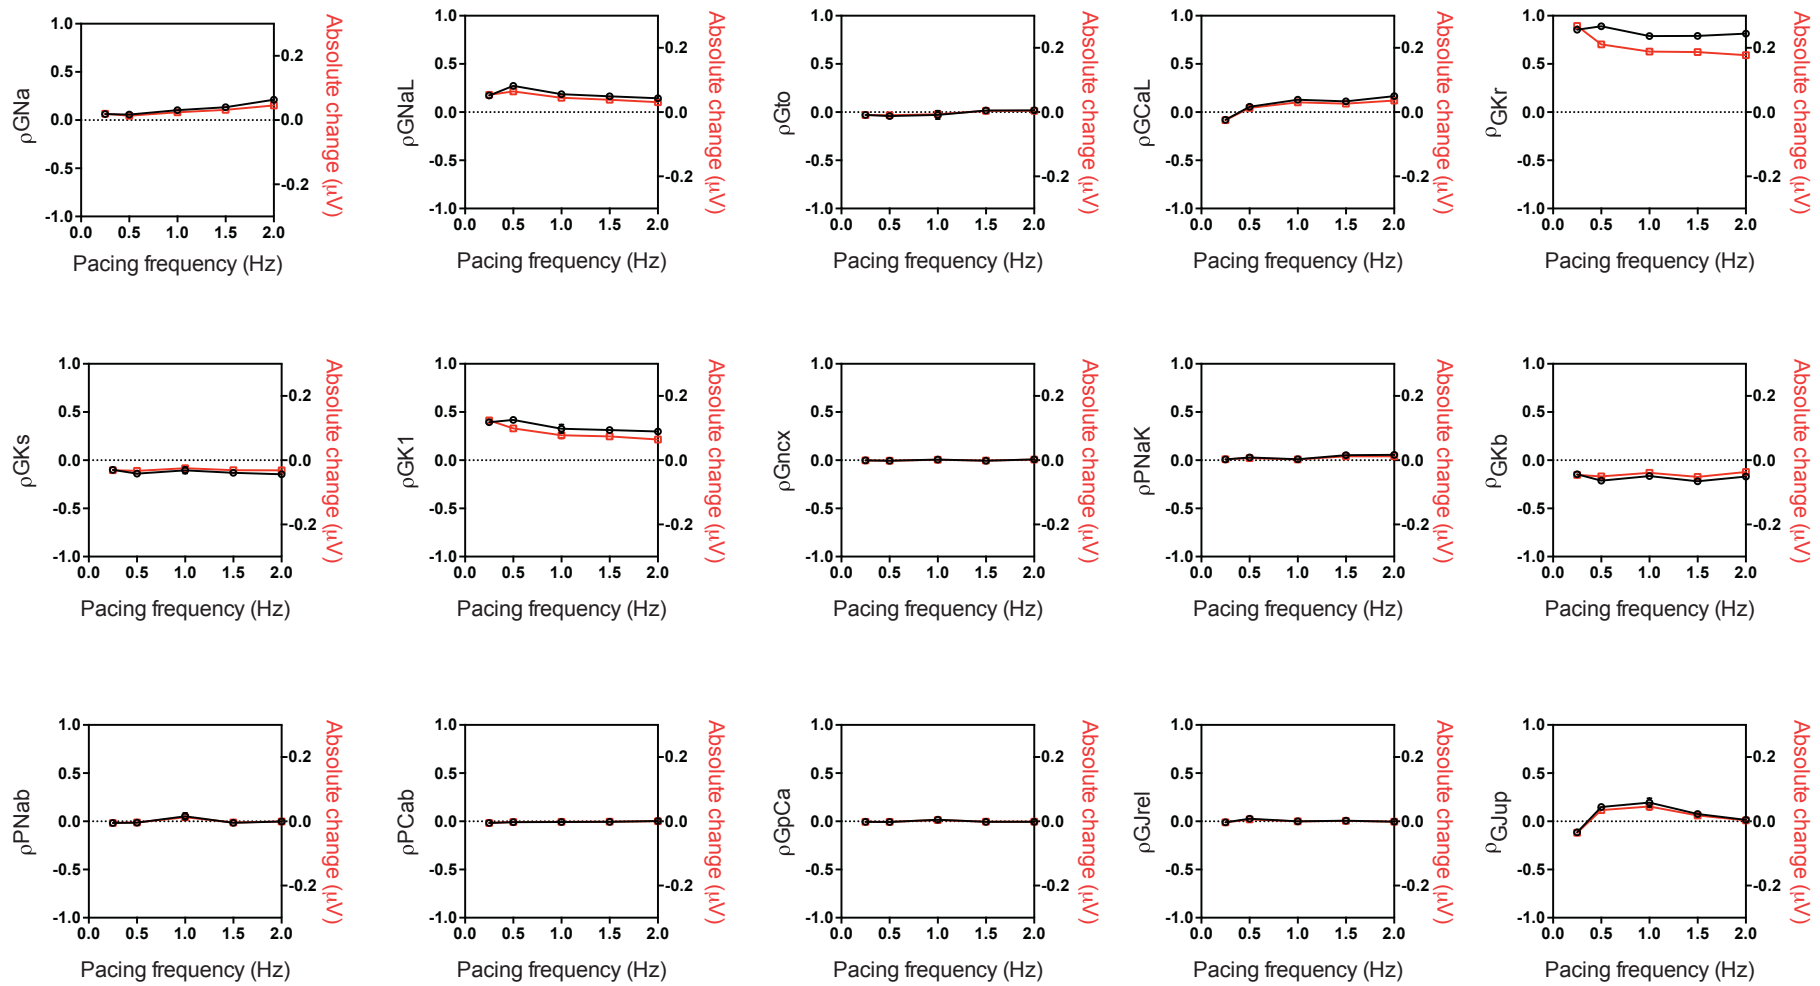

**Supplementary Figure 5:** Rate dependence of PLS regression coefficients ( $\rho$ , black line) and absolute changes (red line) in  $T_{\text{height}}$  for all ionic conductances in the ventricular cell model.
